# Supplementary material
Source: PubMed Central journal article supplement (PMC8259405)
Supplement: NIHMS1715884-supplement-Supporting_Information.pdf [file NIHMS1715884-supplement-Supporting_Information.pdf]

## **Supporting Information for:**

# **Uncovering the molecular interactions in the catalytic loop that modulate the conformational dynamics in protein tyrosine phosphatase 1B**

Danica S. Cui<sup>1</sup>, James Michael Lipchock<sup>2</sup>, Dennis Brookner<sup>3</sup>, and J. Patrick Loria<sup>1,3\*</sup>

AUTHOR ADDRESS <sup>1</sup>Department of Chemistry, Yale University, New Haven, CT, 06511

<sup>2</sup>Department of Chemistry, Washington College, Maryland

<sup>3</sup>Department of Molecular Biophysics and Biochemistry, Yale University, New Haven, CT 06511

## Supplementary Tables

**Table S1.** Summary of residues experiencing  $R_{ex} > 2 \text{ s}^{-1}$  obtained from the  $^{13}\text{C}$  MQ CPMG relaxation dispersion experiments

|             | WT          |     |             | T177A       |            | P180A       |     |             | F182A       |     |             | P185A       |     |             | P188A                 |                        |
|-------------|-------------|-----|-------------|-------------|------------|-------------|-----|-------------|-------------|-----|-------------|-------------|-----|-------------|-----------------------|------------------------|
|             | Field (MHz) |     |             | Field (MHz) |            | Field (MHz) |     |             | Field (MHz) |     |             | Field (MHz) |     |             | Field (MHz)           |                        |
|             | 600         | 800 |             | 600         |            | 600         | 700 |             | 600         | 700 |             | 600         | 800 |             | 600                   | 700                    |
|             | $k_{ex}$    |     |             | $k_{ex}$    |            | $k_{ex}$    |     |             | $k_{ex}$    |     |             | $k_{ex}$    |     |             | $k_{ex}$              |                        |
|             | 1920 ± 142  |     |             | 1910 ± 73   |            | 1460 ± 60   |     |             | 770 ± 110   |     |             | 775 ± 110   |     |             | Group I:<br>1980 ± 60 | Group II:<br>730 ± 110 |
| $2^\circ$   | Residues    |     | $2^\circ$   | Residues    | $2^\circ$  | Residues    |     | $2^\circ$   | Residues    |     | $2^\circ$   | Residues    |     | $2^\circ$   | Residues              |                        |
| Q           | 261         | 261 | Q           | 261         | Q          | 261         | 261 | Q           | 261         | 261 | Q           | 261         |     | Q           | 261                   |                        |
| WPD         | 184         | 184 | WPD         | 184         | WPD        | 184         |     | $\alpha 2'$ |             | 23  | $\alpha 2'$ | 19          | 19  | WPD         | 184                   | 184                    |
| P           | 219         | 219 | P           | 219         | P          | 219         | 219 | $\alpha 6$  |             | 275 | $\alpha 2'$ | 23          |     | P           | 219                   | 219                    |
| $\alpha 2'$ | 19          | 19  | $\alpha 2'$ | 23          | $\alpha 5$ | 246         |     |             |             |     | $\alpha 5$  | 246         | 246 | $\alpha 6$  | 281                   |                        |
| $\alpha 2'$ | 23          | 23  | $\alpha 5$  | 246         | $\alpha 6$ | 281         | 281 |             |             |     | $\alpha 6$  | 281         | 281 | $\beta 2$   | 72                    | 72                     |
| $\alpha 5$  | 246         | 246 | $\alpha 6$  | 281         | $\beta 1$  |             | 57  |             |             |     | $\beta 1$   | 57          |     | $\alpha 2'$ | 23                    | 23                     |
| $\alpha 6$  | 275         | 275 | $\beta 2$   | 72          | $\beta 2$  | 72          | 72  |             |             |     |             |             |     | $\alpha 5$  | 246                   |                        |
| $\alpha 6$  | 281         | 281 | $\beta 11$  | 171         | $\beta 11$ | 171         |     |             |             |     |             |             |     | $\alpha 6$  | 275                   | 275                    |
| $\beta 1$   | 57          | 57  |             |             |            |             |     |             |             |     |             |             |     |             |                       |                        |
| $\beta 7$   | 134         | 134 |             |             |            |             |     |             |             |     |             |             |     |             |                       |                        |

**Table S2.** Data collection and refinement statistics of PTP1B Ala loop mutants

|                                     | <b>T177A apo</b>              | <b>P180A apo</b>             | <b>F182A apo</b>              | <b>P185A apo</b>              | <b>P188A apo</b>            |
|-------------------------------------|-------------------------------|------------------------------|-------------------------------|-------------------------------|-----------------------------|
| <b>PDB ID</b>                       | 6PFW                          | 6OMY                         | 6OL4                          | 6OLV                          | 6OLQ                        |
| <b>Data collection</b>              |                               |                              |                               |                               |                             |
| X-ray source                        | Home source                   | Home source                  | Home source                   | Home source                   | Home source                 |
| Wavelength (Å)                      | 1.54                          | 1.54                         | 1.54                          | 1.54                          | 1.54                        |
| Space group                         | P 3 <sub>1</sub> 2 1          | P 3 <sub>1</sub> 2 1         | P 3 <sub>1</sub> 2 1          | P 3 <sub>1</sub> 2 1          | P 3 <sub>1</sub> 2 1        |
| Cell dimensions                     |                               |                              |                               |                               |                             |
| a, b, c (Å)                         | 87.93 87.93<br>102.92         | 88.26 88.26<br>103.32        | 88.09 88.09<br>103.74         | 88.52 88.52<br>103.87         | 88.52 88.52<br>104.25       |
| α, β, γ (°)                         | 90 90 120                     | 90 90 120                    | 90 90 120                     | 90 90 120                     | 90 90 120                   |
| Resolution range                    | 35.71 - 2.34<br>(2.42 - 2.34) | 31.4 - 2.11<br>(2.18 - 2.11) | 30.73 - 2.15<br>(2.23 - 2.15) | 38.33 - 2.10<br>(2.18 - 2.10) | 33.74 - 2.1<br>(2.18 - 2.1) |
| R-merge                             | 0.086 (0.807)                 | 0.079 (0.173)                | 0.108 (0.727)                 | 0.114 (0.632)                 | 0.076 (0.236)               |
| Mean I/sigma(I)                     | 11.1 (2.3)                    | 22.4 (13.9)                  | 11.4 (3.0)                    | 10.3 (3.9)                    | 16.6 (7.8)                  |
| Total reflections                   | 112123 (10036)                | 289922 (26583)               | 251738 (21529)                | 295778 (27287)                | 193332 (17197)              |
| CC1/2                               | 0.998 (0.878)                 | 0.998 (0.990)                | 0.998 (0.885)                 | 0.999 (0.889)                 | 0.997 (0.975)               |
|                                     |                               |                              |                               |                               |                             |
| Completeness (%)                    | 92.9 (96.0)                   | 98.1 (99.3)                  | 96.2 (99.3)                   | 98.7 (99.8)                   | 97.7 (99.2)                 |
| Multiplicity                        | 5.9 (5.3)                     | 10.7 (10.3)                  | 9.8 (8.6)                     | 10.6 (10.0)                   | 6.9 (6.3)                   |
| <b>Refinement</b>                   |                               |                              |                               |                               |                             |
| Unique reflections                  | 18473 (1885)                  | 27154 (2652)                 | 24828 (2505)                  | 27591 (2723)                  | 27420 (2728)                |
| Wilson B-factor                     | 39.14                         | 29.29                        | 38.93                         | 33.11                         | 30.09                       |
| Reflections used in refinement      | 18471 (1885)                  | 27152 (2696)                 | 24823 (2505)                  | 27586 (2723)                  | 27415 (2728)                |
| R-work                              | 0.209 (0.282)                 | 0.187 (0.222)                | 0.217 (0.286)                 | 0.206 (0.249)                 | 0.203 (0.2376)              |
| R-free                              | 0.247 (0.368)                 | 0.203 (0.284)                | 0.258 (0.349)                 | 0.237 (0.345)                 | 0.235 (0.3058)              |
| <b>Number of non-hydrogen atoms</b> |                               |                              |                               |                               |                             |
| macromolecules                      | 2410                          | 2437                         | 2593                          | 2301                          | 2521                        |
| ligands                             | 16                            | 12                           | 18                            | 22                            | 22                          |
| solvent                             | 129                           | 239                          | 171                           | 226                           | 225                         |
| Protein residues                    | 297                           | 297                          | 296                           | 283                           | 297                         |
| <b>Average B-factor</b>             | 42.05                         | 32.66                        | 46.12                         | 39.12                         | 34.39                       |
| macromolecules                      | 41.86                         | 31.84                        | 45.93                         | 38.39                         | 33.68                       |
| ligands                             | 60.72                         | 42.77                        | 60.42                         | 54.60                         | 43.16                       |
| solvent                             | 43.36                         | 40.46                        | 47.61                         | 45.01                         | 41.52                       |
| RMS(bonds)                          | 0.010                         | 0.009                        | 0.009                         | 0.011                         | 0.011                       |
| RMS(angles)                         | 1.07                          | 0.97                         | 1.03                          | 1.02                          | 1.16                        |
| Ramachandran favored (%)            | 96.27                         | 97.29                        | 96.56                         | 96.09                         | 96.95                       |
| Ramachandran allowed (%)            | 3.39                          | 2.37                         | 3.09                          | 3.56                          | 2.71                        |
| Ramachandran outliers (%)           | 0.34                          | 0.34                         | 0.34                          | 0.36                          | 0.34                        |

**Table S3.** Data collection and refinement statistics for vanadate soaked structures

|                                     | <b>T177A<br/>Vanadate</b>     | <b>P180A<br/>Vanadate</b>     | <b>F182A<br/>Vanadate</b>     | <b>P185A<br/>Vanadate</b>     | <b>P188A<br/>Vanadate</b>     |
|-------------------------------------|-------------------------------|-------------------------------|-------------------------------|-------------------------------|-------------------------------|
| <b>PDB ID:</b>                      | 6PGT                          | 6PM8                          | 6PHA                          | 6PHS                          | 6PGO                          |
| <b>Data collection</b>              |                               |                               |                               |                               |                               |
| X-ray source                        | Home source                   | Home source                   | Home source                   | Home source                   | Home source                   |
| Wavelength (Å)                      | 1.54                          | 1.54                          | 1.54                          | 1.54                          | 1.54                          |
| Space group                         | P 3 <sub>1</sub> 2 1          |
| Cell dimensions                     |                               |                               |                               |                               |                               |
| a, b, c (Å)                         | 88.08 88.08<br>103.65         | 88.30 88.30<br>104.00         | 87.56 87.56<br>102.37         | 87.70 87.70<br>102.96         | 88.23 88.23<br>104.07         |
| α, β, γ (°)                         | 90 90 120                     | 90 90 120                     | 90 90 120                     | 90 90 120                     | 90 90 120                     |
| Resolution range                    | 38.14 - 2.20<br>(2.38 - 2.20) | 28.90 - 2.06<br>(2.18 - 2.06) | 30.47 - 2.30<br>(2.38 - 2.30) | 37.98 - 2.13<br>(2.25 - 2.13) | 30.79 - 2.10<br>(2.18 - 2.10) |
| R-merge                             | 0.086 (0.335)                 | 0.094 (0.310)                 | 0.215 (1.004)                 | 0.109 (0.728)                 | 0.062 (0.214)                 |
| Mean I/sigma(I)                     | 16.9 (7.2)                    | 16.4 (6.8)                    | 4.4 (2.7)                     | 10.0 (2.4)                    | 17.7 (8.3)                    |
| Total reflections                   | 220924 (21380)                | 289255 (26078)                | 195928 (18013)                | 144125 (14177)                | 183285 (15601)                |
| CC1/2                               | 0.998 (0.980)                 | 0.998 (0.975)                 | 0.992 (0.851)                 | 0.997 (0.805)                 | 0.998 (0.974)                 |
|                                     |                               |                               |                               |                               |                               |
| Completeness (%)                    | 96.1 (98.2)                   | 98.3 (98.2)                   | 97.9 (99.9)                   | 99.5 (98.4)                   | 95.1 (98.6)                   |
| Multiplicity                        | 10.5 (10.2)                   | 10.5 (9.8)                    | 9.5 (8.9)                     | 5.8 (5.8)                     | 6.8 (5.8)                     |
| <b>Refinement</b>                   |                               |                               |                               |                               |                               |
| Unique reflections                  | 23137 (2296)                  | 29002 (2683)                  | 20246 (2032)                  | 26023 (2535)                  | 26477 (2689)                  |
| Wilson B-factor                     | 32.78                         | 29.65                         | 37.61                         | 34.03                         | 30.65                         |
| Reflections used in refinement      | 23133 (2040)                  | 29000 (2685)                  | 20243 (2032)                  | 26020 (2437)                  | 26475 (2689)                  |
| R-work                              | 0.189 (0.324)                 | 0.195 (0.243)                 | 0.223 (0.246)                 | 0.199 (0.267)                 | 0.195 (0.226)                 |
| R-free                              | 0.230 (0.336)                 | 0.220 (0.270)                 | 0.276 (0.335)                 | 0.242 (0.287)                 | 0.225 (0.297)                 |
| <b>Number of non-hydrogen atoms</b> | 2708                          | 2730                          | 2616                          | 2555                          | 2683                          |
| macromolecules                      | 2435                          | 2432                          | 2417                          | 2410                          | 2416                          |
| ligands                             | 23                            | 23                            | 47                            | 17                            | 28                            |
| solvent                             | 250                           | 275                           | 152                           | 128                           | 239                           |
| Protein residues                    | 298                           | 297                           | 297                           | 297                           | 297                           |
| <b>Average B-factor</b>             | 36.40                         | 32.60                         | 36.53                         | 37.32                         | 33.92                         |
| macromolecules                      | 35.79                         | 31.57                         | 35.81                         | 36.97                         | 33.21                         |
| ligands                             | 42.47                         | 41.38                         | 51.17                         | 45.30                         | 44.48                         |
| solvent                             | 41.75                         | 40.97                         | 43.53                         | 42.92                         | 39.80                         |
| RMS(bonds)                          | 0.010                         | 0.017                         | 0.010                         | 0.009                         | 0.010                         |
| RMS(angles)                         | 1.24                          | 1.03                          | 1.14                          | 1.11                          | 1.04                          |
| Ramachandran favored (%)            | 96.96                         | 96.95                         | 96.95                         | 97.29                         | 96.95                         |
| Ramachandran allowed (%)            | 2.70                          | 2.71                          | 2.71                          | 2.03                          | 2.71                          |
| Ramachandran outliers (%)           | 0.34                          | 0.34                          | 0.34                          | 0.68                          | 0.34                          |

Statistics for the highest-resolution shell are shown in parentheses.



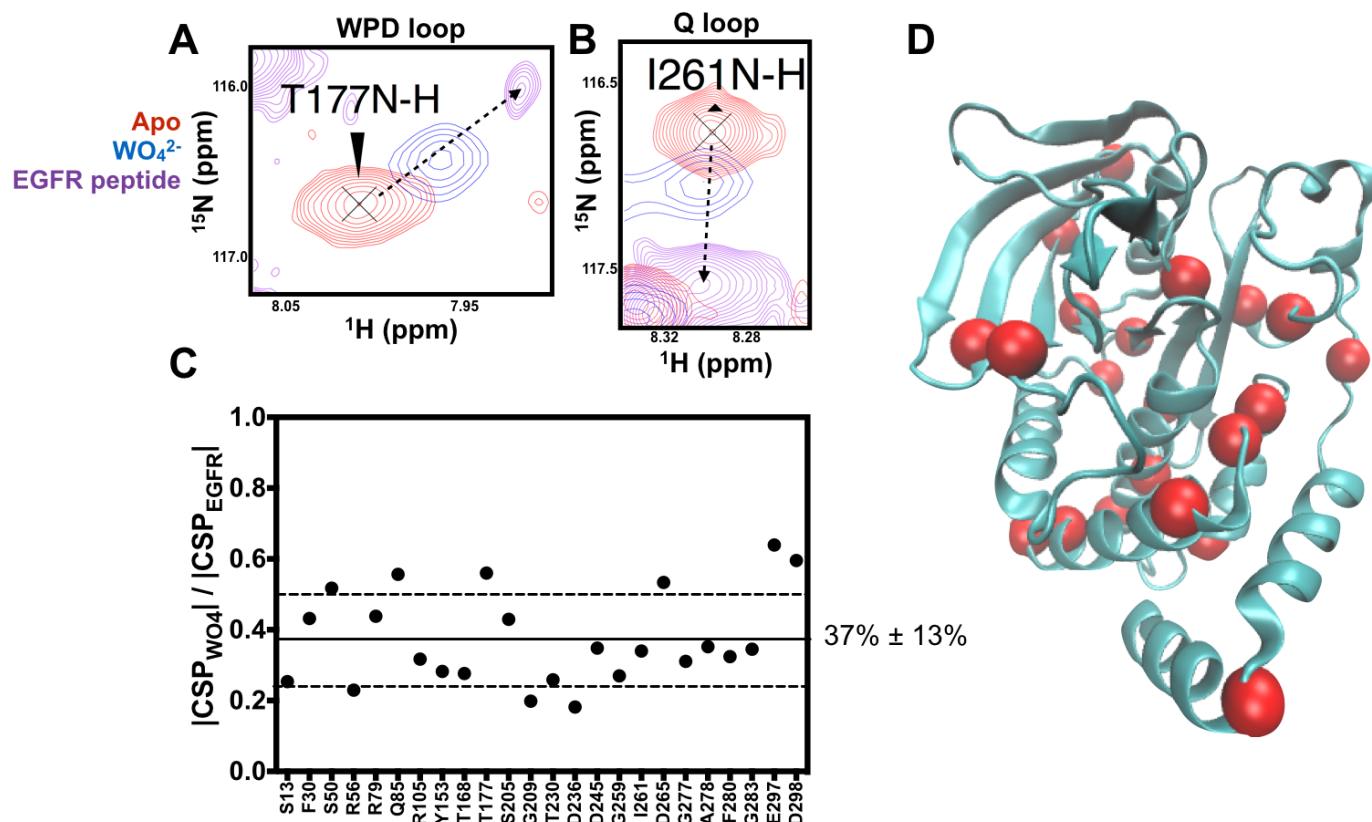

**Fig. S2.**

The closed population of WO<sub>4</sub><sup>2-</sup> bound PTP1B is estimated through the comparison to NMR chemical shifts of DADEXLIP (EGFR) peptide saturated PTP1B. An overlay of WT apo (red), WO<sub>4</sub><sup>2-</sup> (blue), and EGFR peptide (purple) saturated PTP1B <sup>15</sup>N spectra is shown for A) T177 (WPD loop) and B) I261 (Q-loop). The CSPs of WO<sub>4</sub><sup>2-</sup> are observed to lie along a linear trajectory between WT apo and EGFR peptide bound resonances. This indicates that upon binding, both ligands shift the two-state protein conformational equilibrium from open to closed state albeit to varying degrees. C) Plot of the ratio of CSP magnitudes between WO<sub>4</sub><sup>2-</sup> and EGFR for all residues that exhibit a linear CSP trend. The CSP induced by EGFR peptide binding occurs in the slow exchange regime. The EGFR peptide bound resonance observed for each residue will reflect protein in the closed conformation. The ratio of CSP<sub>WO4</sub>/CSP<sub>EGFR</sub> estimates the closed population of WO<sub>4</sub><sup>2-</sup> bound to be 37% ± 13%. D) Cartoon representation of PTP1B with the residues used for CSP analysis shown as red spheres.

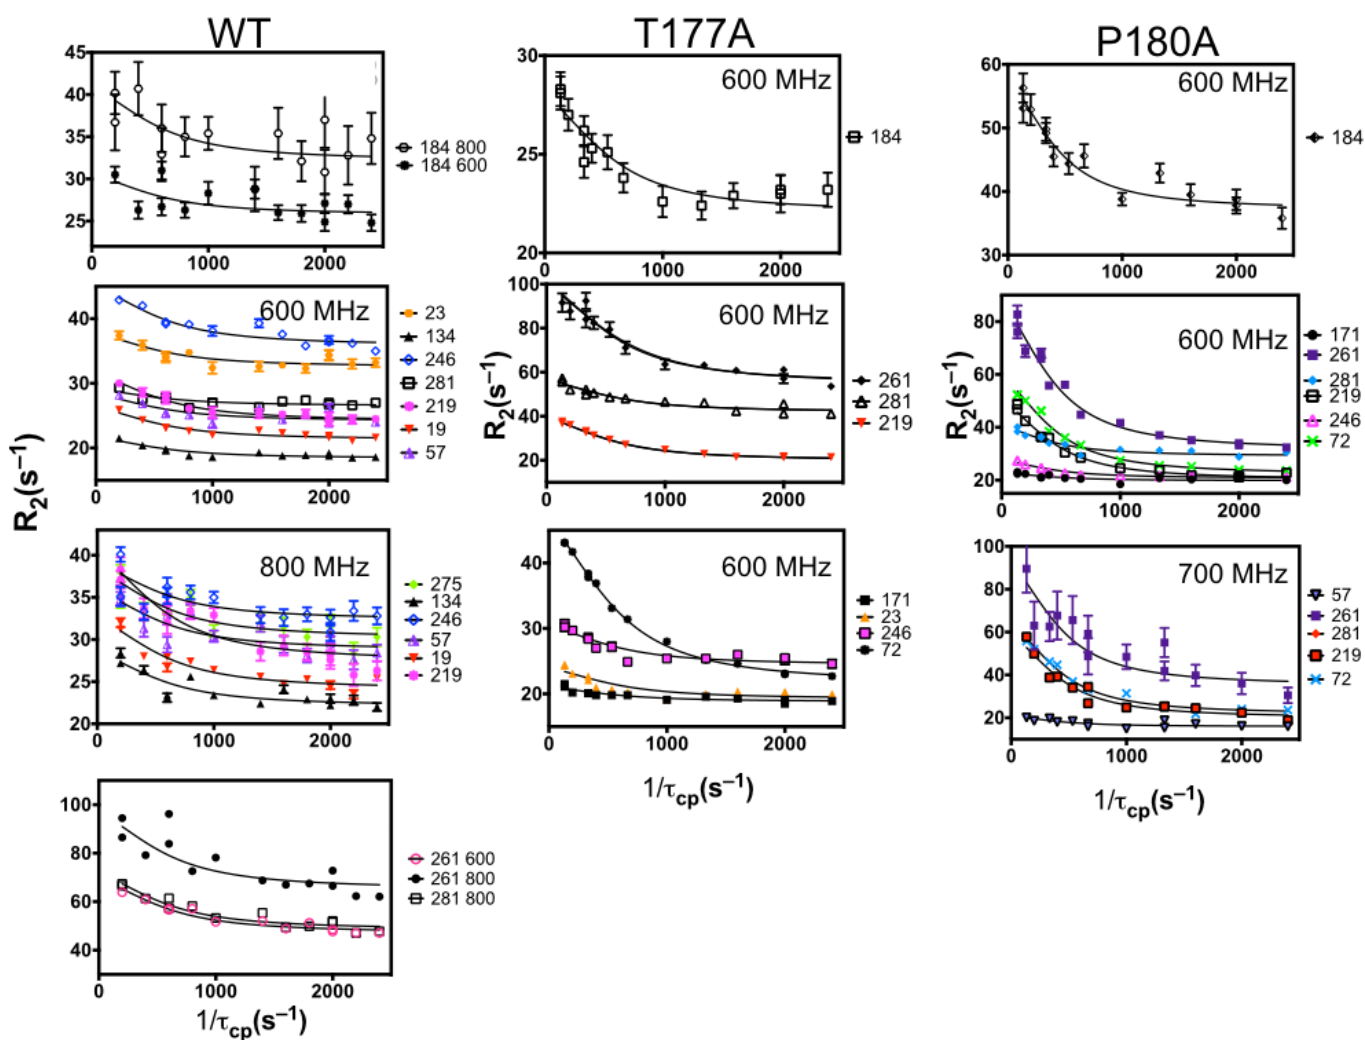

**Fig. S3.**

$^{13}\text{C}$  MQ CPMG relaxation dispersion curves for WT, T177A, and P180A are shown for residues exhibiting  $R_{\text{ex}} > 2\text{s}^{-1}$ . Data were acquired at 600, 700, and 800 MHz.

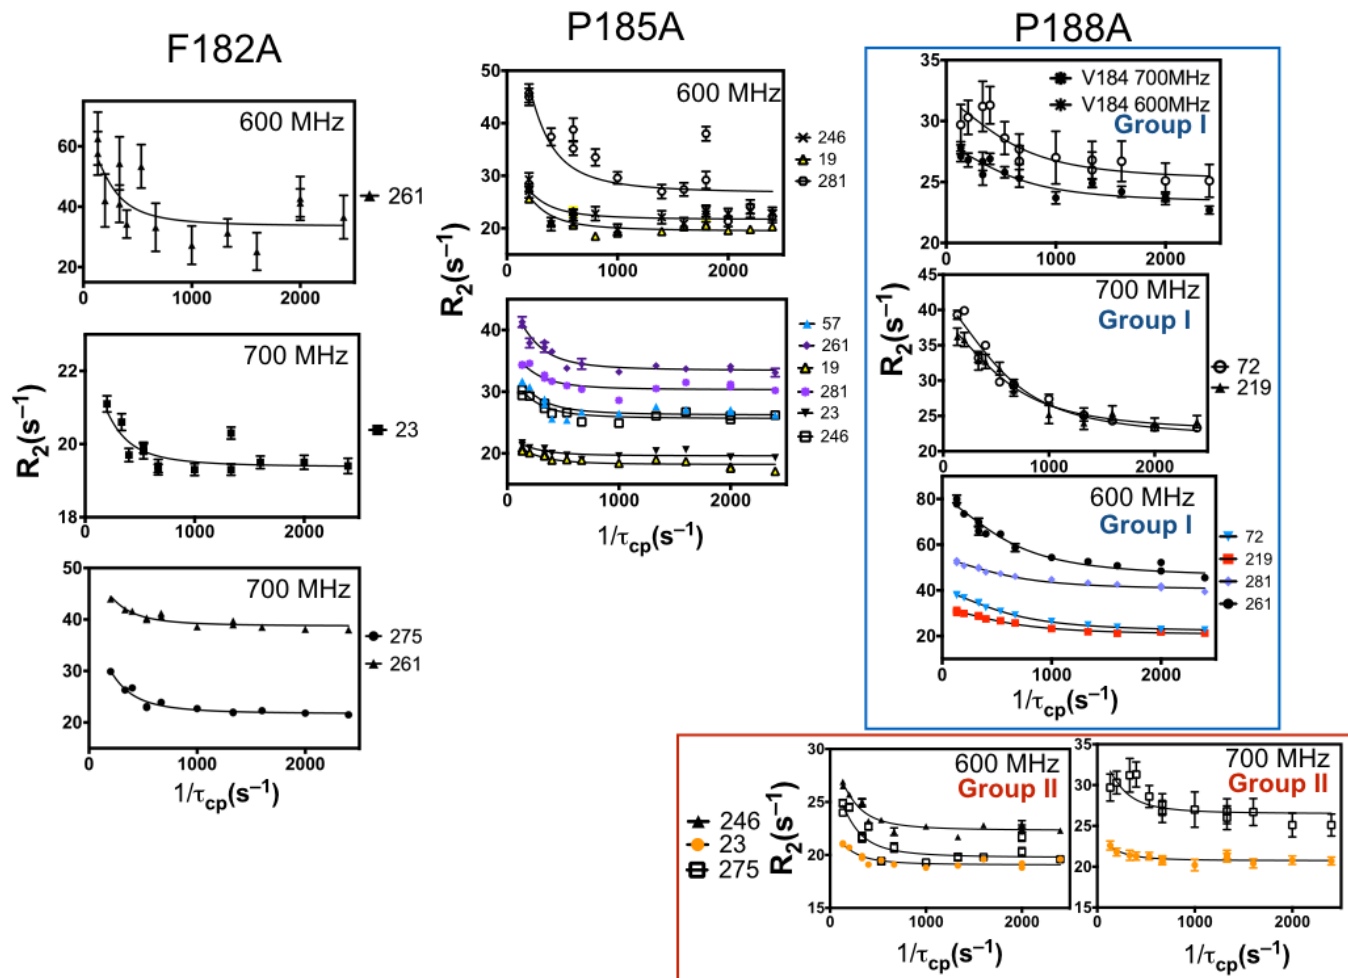

**Fig. S4.**

$^{13}\text{C}$  MQ CPMG relaxation dispersion curves for F182A, P185A, and P188A are shown for residues exhibiting  $R_{\text{ex}} > 2\text{s}^{-1}$ . For P188A blue and red boxes denote residue grouping of fast ( $1980\text{ s}^{-1}$ ) and slow ( $730\text{ s}^{-1}$ ) timescale motions. Data were acquired at 600, 700, and 800 MHz.



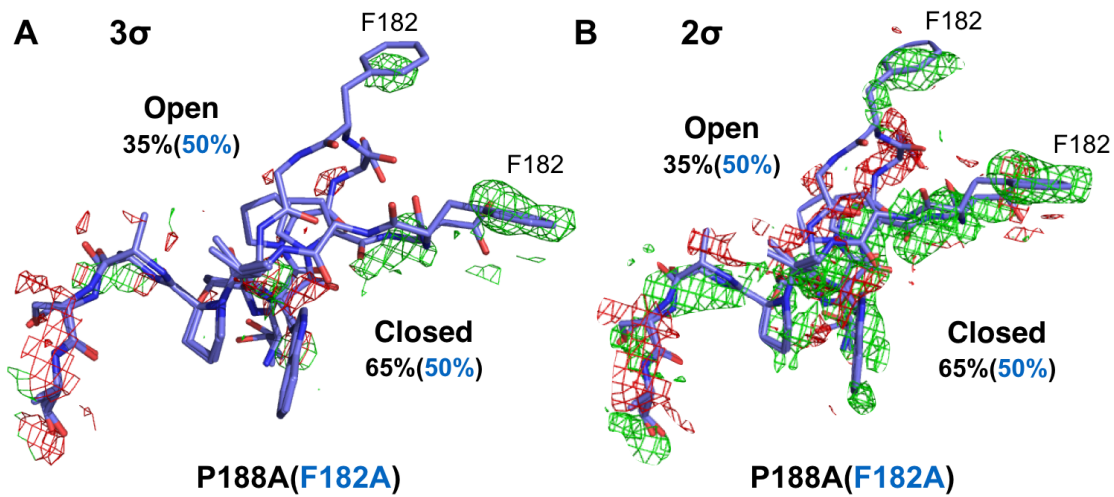

**Fig. S5.**

Fo – Fo isomorphous difference map of P188A – F182A. This is used to validate the occupancy modeling of the electron density in the open and closed WPD loop conformations. P188A has an open:closed occupancy of 35:65%, while F182A has an occupancy of 50:50%. Here we show the difference map at A) +/- 3 $\sigma$  and B) +/- 2 $\sigma$ . The positive peaks are shown in green, negative peaks are shown in red. At 3 $\sigma$ , the missing density for the aromatic side chain in F182A is apparent. At 2 $\sigma$ , differences in electron density between P188A, and F182A in the open and closed states become apparent. In the closed conformation, the difference map reveals positive peaks indicating that there is more electron density in the closed conformation in P188A relative to F182A. In the open loop conformation, the Fo-Fo map shows negative density demonstrating that there is more electron density the open loop of F182A than P188A. The difference map is rendered in Pymol<sup>1</sup> and projected on to the WPD loop (177-188) of P188A.

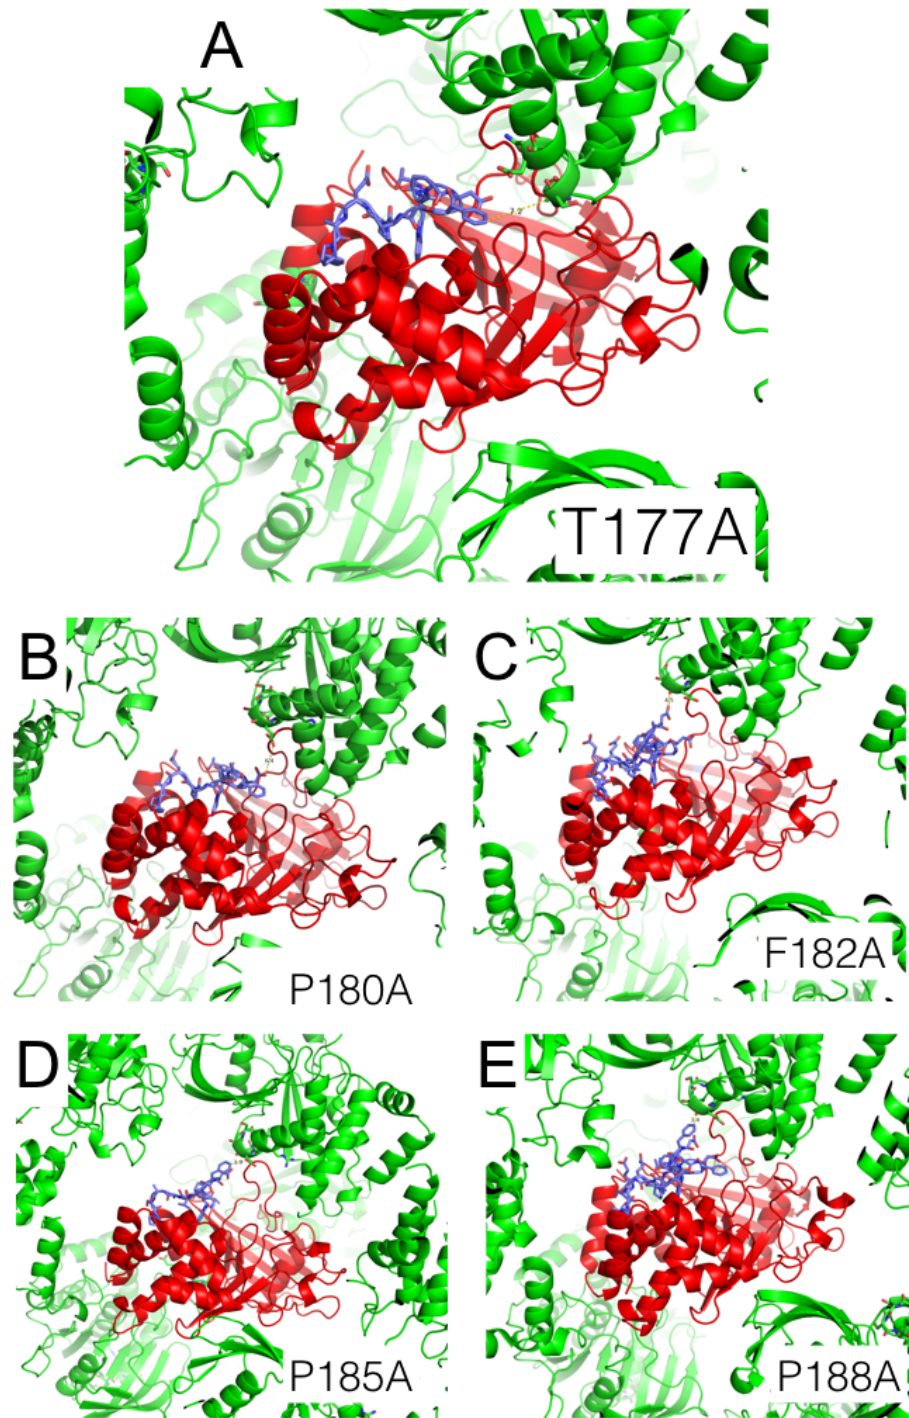

**Fig. S6.**

Crystal packing in PTP1B Ala loop mutants. Symmetry molecules observed in the asymmetrical unit. The molecule of interest is shown in red. The symmetry molecules are represented in green. The WPD loop is shown in stick (blue).

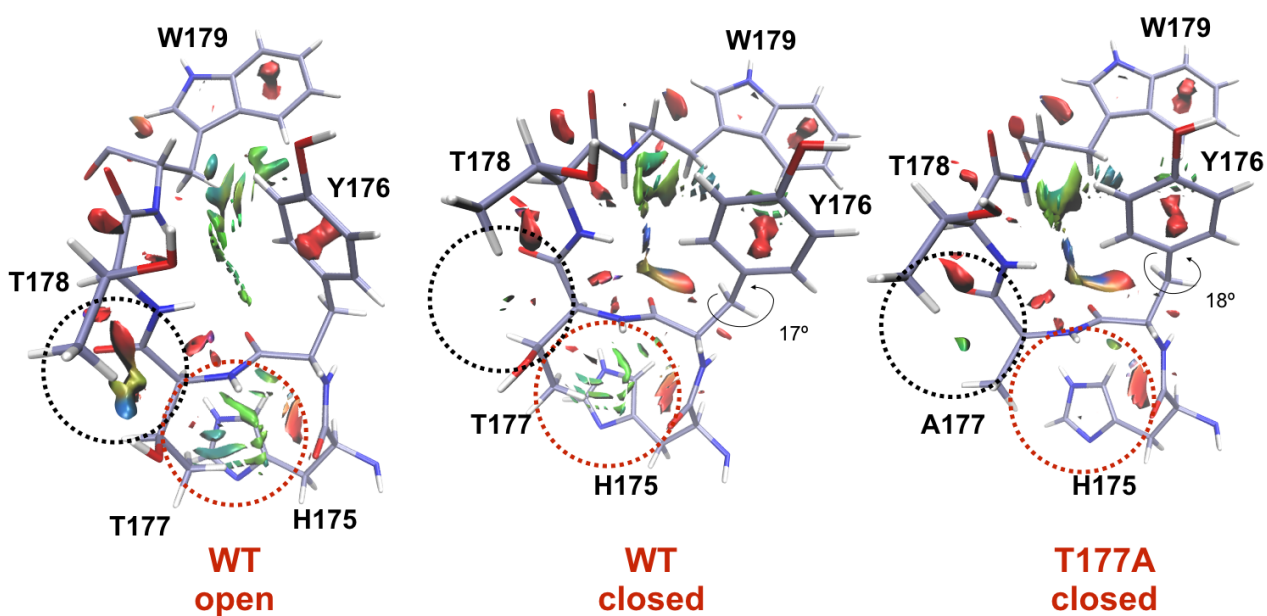

**Fig. S7.**

Comparison of interactions between H175 to T178 in WT and T177A using NCIPLOT.<sup>2</sup> The reduced density gradient surfaces are rendered using isosurface in VMD<sup>3</sup> with an isovalue = 0.4 au. A BGR color scale is used to describe the attractive (blue), van der Waals (green), and repulsive (red) interactions. The color scale is set between a scale of  $-2 < \text{sign}(\lambda^2)\rho < 2$ . The dashed enclosures represent the main differences between mutant and WT.

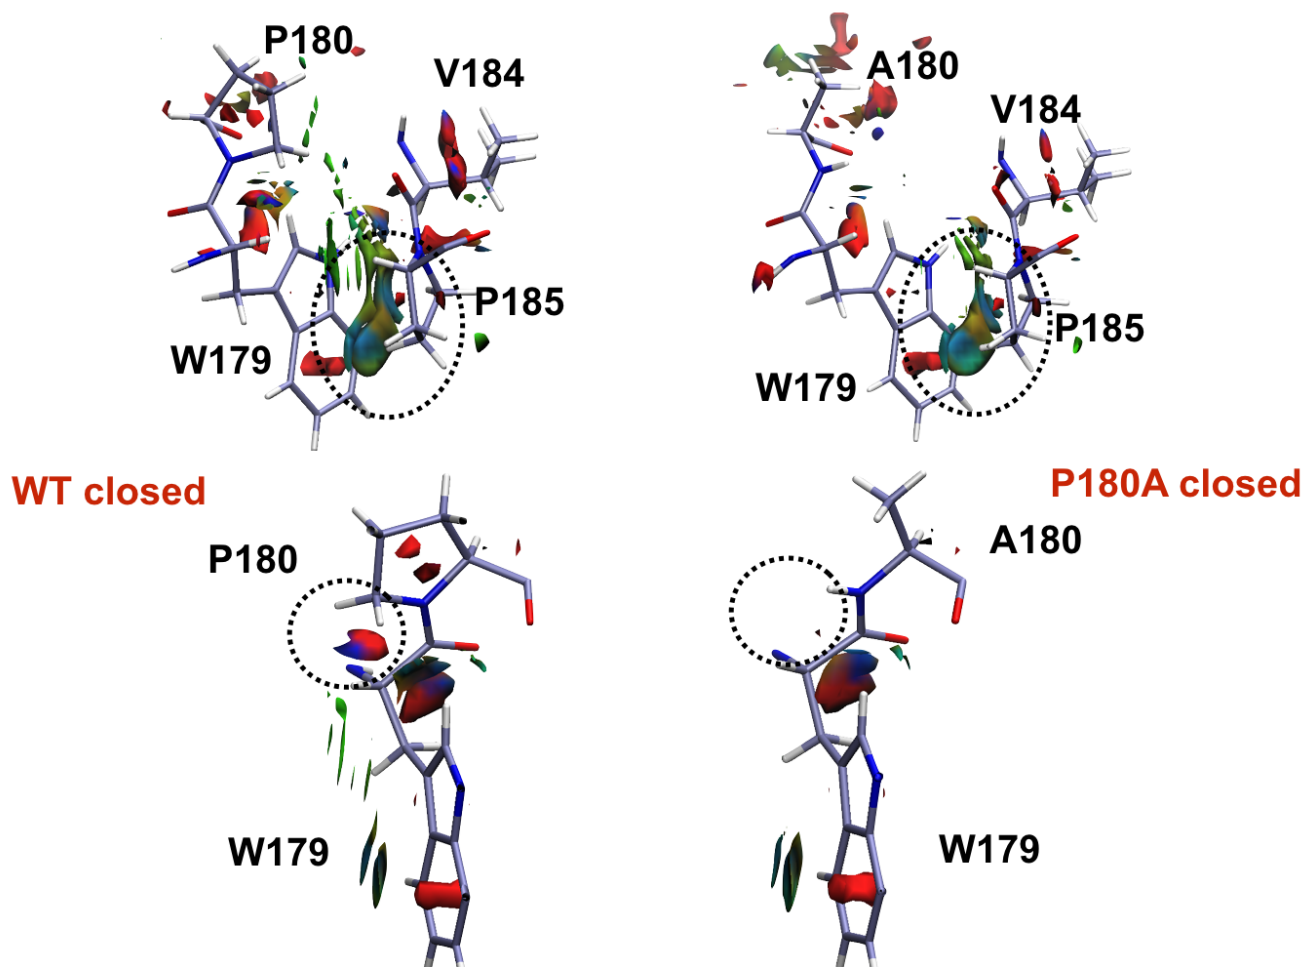

**Fig S8.**

Comparison of the closed loop interactions in WT (left) and P180A (right). CH- $\pi$  interaction between W179 and P185 is retained in P180A. Additionally, there is less side chain steric repulsion observed between the side chain of W179 and A180 compared to P180. The dashed enclosures represent the main differences between mutant and WT.

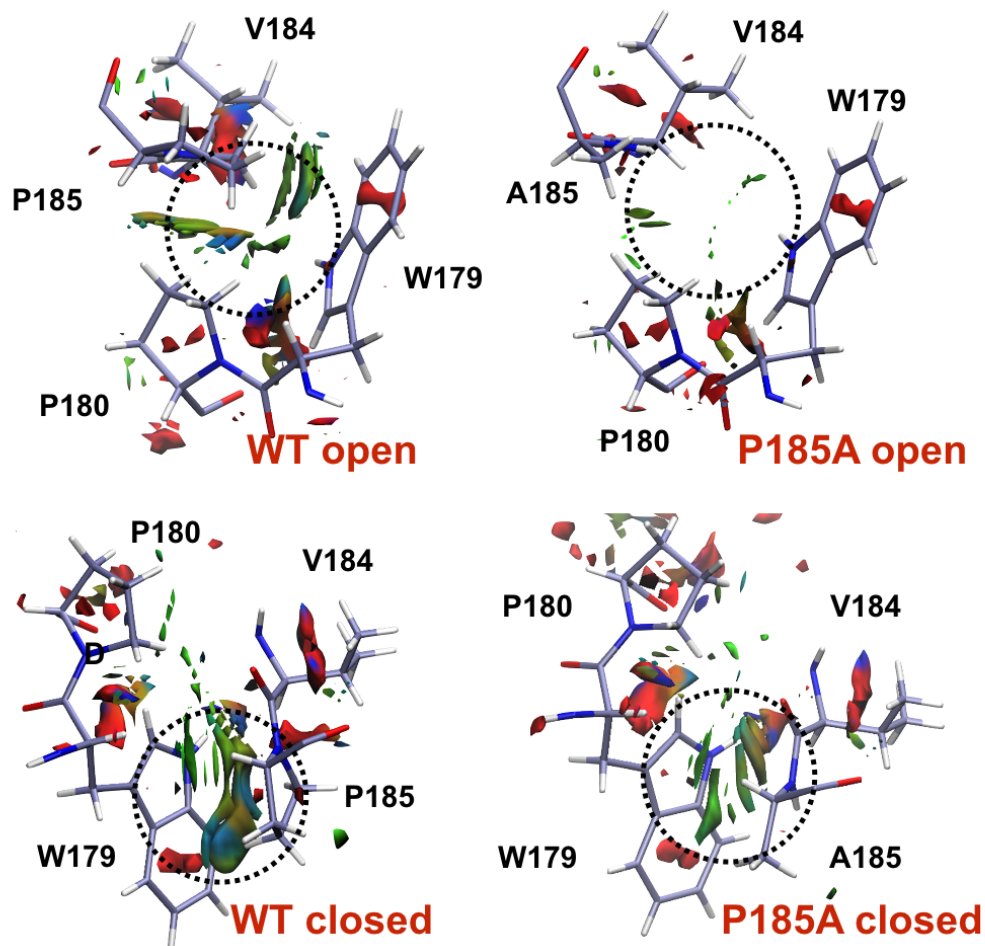

**Fig. S9.**

Molecular rendering of W179, P180, V184, P185 (A185) in open conformations of WT (A) and P185A (B), and closed conformations of WT (C) and P185A (D). NCIPLOT was used to visualize the van der Waals interactions and CH- $\pi$  interactions in the open and closed states. There is a decrease in side chain interactions formed by A185 in both the open and closed loop states compared to WT. The dashed enclosures represent the main differences between mutant and WT.

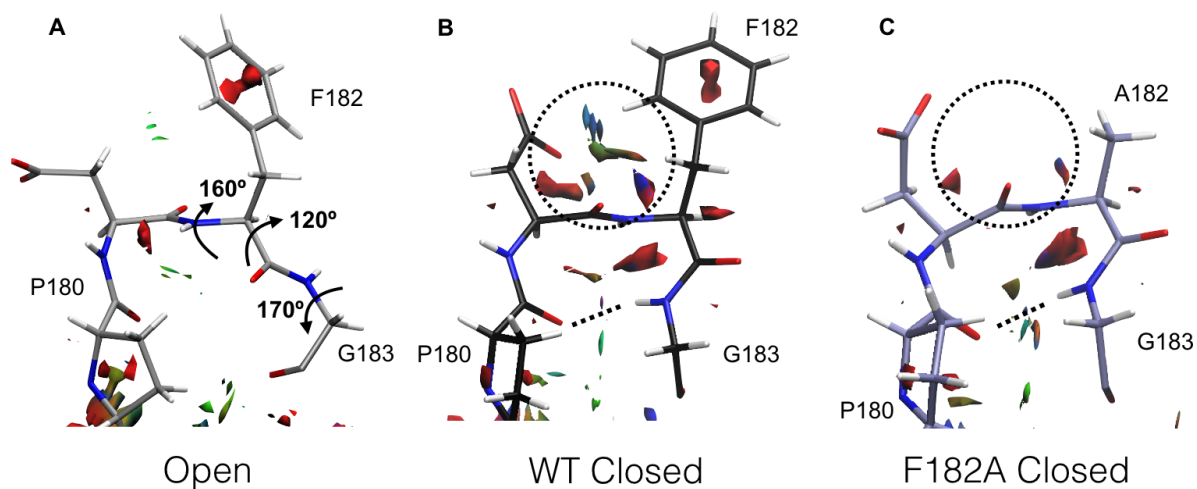

**Fig. S10.**

A) Rotation of  $\psi$  and  $\phi$  angle in 182 and 183 are shown on the open WT loop structure. B) Closed WT loop structure with steric hindrance indicated by the red arrows. C) F182A loop closed structure with steric interactions mapped. H-bond between P180 and G183 is represented with a dashed line. The dashed enclosures represent the main differences between mutant and WT.



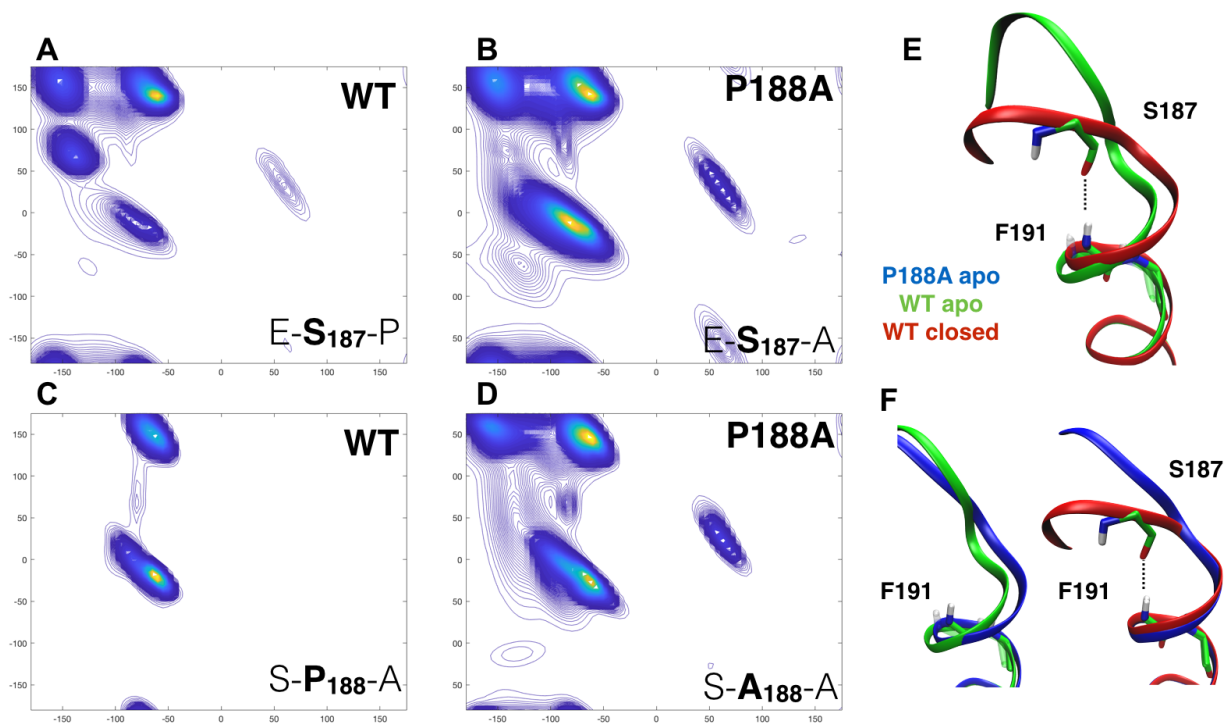

**Fig. S11.**

Probability distribution of neighbor dependent Ramachandran plots<sup>4,17</sup> for A) S187 (WT), B) S187 (P188A), C) P188 (WT), and D) A188(P188A). E) Changes in backbone of  $\alpha 3$  between open (green) and closed (red) WT loop is shown in ribbon. Amide of F191 is shown in stick for open (transparent) and closed states. F) Comparison of WT open and closed states in  $\alpha 3$  to P188A apo (blue) and the amide position of F191.

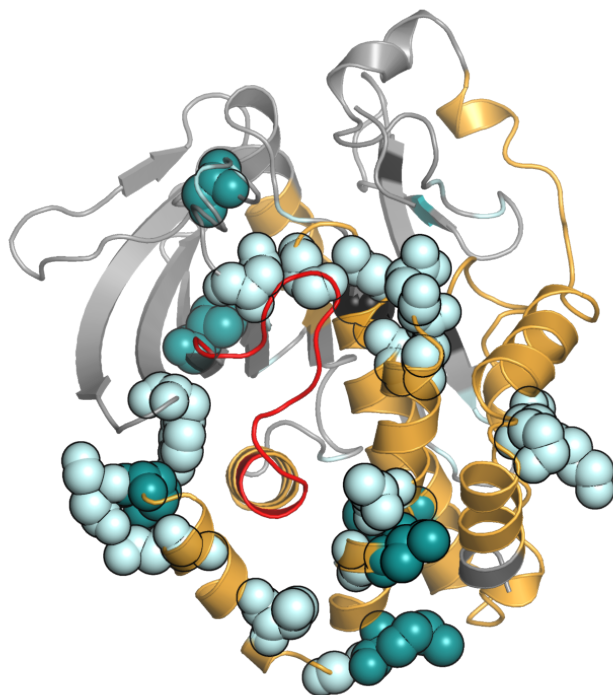

**Fig. S12.**

Allosteric network identified through frequency analysis of CSP of 13 Ala WPD loop mutations.  $^5 D\alpha$  is represented in orange,  $D\beta$  in gray, and the WPD loop is in red. Residues that are allosterically coupled to the active site are shown in teal (> 7 out of 13 loop mutants) and light blue (>5 out of 13 loop).



## References

- [1] In *The PyMOL Molecular Graphics System, Version 2.0 Schrödinger, LLC*.
- [2] Contreras-Garcia, J., Johnson, E. R., Keinan, S., Chaudret, R., Piquemal, J. P., Beratan, D. N., and Yang, W. (2011) NCIPLLOT: a program for plotting non-covalent interaction regions, *J Chem Theory Comput* 7, 625-632.
- [3] Humphrey, W., Dalke, A., and Schulten, K. (1996) VMD: visual molecular dynamics, *J Mol Graph* 14, 33-38, 27-38.
- [4] Ting, D., Wang, G., Shapovalov, M., Mitra, R., Jordan, M. I., and Dunbrack, R. L., Jr. (2010) Neighbor-dependent Ramachandran probability distributions of amino acids developed from a hierarchical Dirichlet process model, *PLoS Comput Biol* 6, e1000763.
- [5] Cui, D. S., Beaumont, V., Ginther, P. S., Lipchock, J. M., and Loria, J. P. (2017) Leveraging Reciprocity to Identify and Characterize Unknown Allosteric Sites in Protein Tyrosine Phosphatases, *J Mol Biol* 429, 2360-2372.
